# Supplementary material for: Hormonal Treatments for Major Depressive Disorder: State of the Art
Source: Atypon-hosted journal article supplement (doi:10.1176/appi.ajp.2020.19080848), 2020-05-27
Supplement: ajp_19080848_correction01.pdf [file ajp_19080848_correction01.pdf]

## **Correction to Dwyer et al.**

When the article “Hormonal Treatments for Major Depressive Disorder: State of the Art,” by Jennifer B. Dwyer, M.D., Ph.D., et al. (doi: 10.1176/appi.ajp.2020.19080848) was published online on May 27, 2020, one author, William M. McDonald, M.D., was left off the byline. The article was reposted online on June 10, 2020, with this author included.
