# Supplementary material for: Hormonal Treatments for Major Depressive Disorder: State of the Art
Source: Atypon-hosted journal article supplement (doi:10.1176/appi.ajp.2020.19080848), 2020-05-27
Supplement: ajp_19080848_correction02.pdf [file ajp_19080848_correction02.pdf]

## **Correction to Dwyer et al.**

When the article “Hormonal Treatments for Major Depressive Disorder: State of the Art,” by Jennifer B. Dwyer, M.D., Ph.D., et al. (doi: 10.1176/appi.ajp.2020.19080848) was published online on May 27, 2020, and in the August 2020 issue, one author, Rajiv Radhakrishnan, M.B.B.S., M.D., was left off the byline. The article was reposted online on September 11, 2020, with this author included.
