# Supplementary material for: Hormonal Treatments for Major Depressive Disorder: State of the Art
Source: Atypon-hosted journal article supplement (doi:10.1176/appi.ajp.2020.19080848), 2020-05-27
Supplement: appi.ajp.2020.19080848.ds001.pdf [file appi.ajp.2020.19080848.ds001.pdf]

 


Psychiatry Online
