# Supplementary material for: Hormonal Treatments for Major Depressive Disorder: State of the Art
Source: Atypon-hosted journal article supplement (doi:10.1176/appi.ajp.2020.19080848), 2020-05-27
Supplement: appi.ajp.2020.19080848.ds001.pdf [file appi.ajp.2020.19080848.ds001.pdf]

**TABLE S1. Randomized Placebo-controlled Trials of Mifepristone for Depression with Psychotic Features**

| Study | NCT          | N (ITT) | Mifepristone Dose (mg) | Primary Outcome Measure                                                                    | Positive Primary Outcome | Plasma mifepristone levels considered <i>a priori</i>          | Positive Secondary Plasma Level Outcomes |
|-------|--------------|---------|------------------------|--------------------------------------------------------------------------------------------|--------------------------|----------------------------------------------------------------|------------------------------------------|
| (58)  | N/A          | 30      | 600                    | Proportion of participants achieving response (50% reduction of BPRS-PSS at Day 8)         | Yes                      | No                                                             | N/A                                      |
| (59)  | N/A          | 221     | 600                    | Proportion of participants achieving response (30% reduction of BPRS on Days 7 and 28)     | Yes                      | No                                                             | N/A                                      |
| (61)  | NCT 00130676 | 258     | 600                    | Proportion of participants achieving response (50% reduction of BPRS-PSS on Days 7 and 56) | No                       | Yes, secondary analysis (prespecified threshold of 1800 ng/ml) | Yes                                      |
| (182) | NCT 00146523 | 247     | 600                    | Proportion of participants achieving response (50% reduction of BPRS-PSS on Days 7 and 28) | No                       | Yes, secondary analysis (prespecified threshold of 1660 ng/ml) | No                                       |
| (183) | NCT 00128479 | 433     | 300, 600, 1200         | Proportion of participants achieving response (50% reduction of BPRS-PSS on Days 7 and 56) | No                       | Yes, secondary analysis (prespecified threshold of 1660 ng/ml) | Yes                                      |
| (184) | NCT 00637494 | 292     | 1200                   | Proportion of participants achieving response (50% reduction of BPRS-PSS on Days 7 and 56) | No                       | Yes, secondary analysis (prespecified threshold of 1637 ng/mL) | Yes                                      |

NCT=ClinicalTrials.gov Identifier Number; ITT=intent to treat; BPRS=Brief Psychiatric Rating Scale; BPRS-PSS=Brief Psychiatric Rating Scale; PSS=positive symptom subscale.

**TABLE S2. Randomized Placebo-controlled Trials of Testosterone**

|                                  | Study               | N<br>(randomized) | Intervention                                                                                                                                             | Depression                                                                                                        | Baseline<br>Testosterone                                                                           | Results                                                                                                                                     |
|----------------------------------|---------------------|-------------------|----------------------------------------------------------------------------------------------------------------------------------------------------------|-------------------------------------------------------------------------------------------------------------------|----------------------------------------------------------------------------------------------------|---------------------------------------------------------------------------------------------------------------------------------------------|
| <b>Major Depressive Disorder</b> |                     |                   |                                                                                                                                                          |                                                                                                                   |                                                                                                    |                                                                                                                                             |
| 1                                | (170)<br><br>8-week | 22                | 1% testosterone gel – 10 g/day<br><br>Antidepressant continued                                                                                           | Inadequate response to one adequate antidepressant trial of 4 weeks duration                                      | low or borderline testosterone levels<br><br>T levels of 350 ng/dl or less (normal range=270-1070) | Significantly greater improvement in HDRS with testosterone gel compared to placebo.<br><br>HDRS difference of 6.6 points.                  |
| 2                                | (171)<br><br>6-week | 26                | Injectable testosterone<br>Week 0 – 200 mg<br>Week 2 – 400 mg<br>Week 4 – 400 mg (responders) or 600 mg (non-responders)<br><br>Antidepressant continued | Partial response or nonresponse to 2 adequate antidepressant trials (at least 6 weeks) during the current episode | Normal testosterone levels<br><br>mean total testosterone level, 417.5 +/- 197 ng/dL               | No significant difference in HDRS scores compared to placebo<br><br>HDRS score difference: 1.0 point<br>Difference in response rates: 30.7% |

|   |                      |                               |                                                                  |                                                                                                                                   |                                                                                             |                                                                                                                                                                                            |
|---|----------------------|-------------------------------|------------------------------------------------------------------|-----------------------------------------------------------------------------------------------------------------------------------|---------------------------------------------------------------------------------------------|--------------------------------------------------------------------------------------------------------------------------------------------------------------------------------------------|
| 3 | (168)<br><br>12-week | 12<br><br>Men age 50 or older | (T) gel 1% - 5 g/day<br><br>Antidepressant continued             | Adequate antidepressant trial of 6 weeks                                                                                          | “hypogonadal men”<br><br>T levels less than 350 ng/dL to be eligible for study              | No significant difference in HDRS scores compared to placebo<br><br>HDRS score difference: 1.2 points                                                                                      |
| 4 | (172)<br><br>6-week  | 30                            | weekly intramuscular injections of T 200 mg<br><br>T monotherapy |                                                                                                                                   | low and low-normal T levels (i.e., total T $\leq$ 350 ng/dl)                                | No significant difference in HDRS scores compared to placebo<br><br>HDRS score difference: -0.4 points (in favor of placebo)<br><br>(primary outcome was self-reported sexual functioning) |
| 5 | (169)<br><br>6-week  | 100                           | T gel 5 g/day<br><br>Antidepressant continued                    | MDD showing partial response or no response to an adequate serotonergic antidepressant trial (6 weeks) during the current episode | Medically healthy adult men<br>low and low-normal T levels (i.e., total T $\leq$ 350 ng/dl) | No significant difference in HDRS scores compared to placebo<br><br>HDRS score difference: 1.0 points<br><br>Difference in response rates: 13.5%                                           |

|                             |                  |                           |                                     |                                                                              |                                               |                                                                                                                                                                                                   |
|-----------------------------|------------------|---------------------------|-------------------------------------|------------------------------------------------------------------------------|-----------------------------------------------|---------------------------------------------------------------------------------------------------------------------------------------------------------------------------------------------------|
|                             |                  |                           |                                     |                                                                              |                                               | Baseline testosterone levels were not associated with response to testosterone                                                                                                                    |
| <b>Non-Major Depression</b> |                  |                           |                                     |                                                                              |                                               |                                                                                                                                                                                                   |
| 1                           | (173)<br>6-week  | 23                        | IM Testosterone<br>200 mg Q 10 days | Mid-life onset male dysthymic disorder (onset after age 40)                  | Low or low normal T<br>Total T <350           | Significantly greater improvement in HDRS with testosterone compared to placebo<br><br>HDRS score difference: 5.6 points                                                                          |
| 2                           | (174)<br>12-week | 33<br>Men age 50 or older | T gel 7.5 g/day                     | subthreshold depression (dysthymia or minor depression, according to DSM-IV) | Total testosterone levels of $\leq$ 280 ng/dL | Significantly greater improvement in HDRS and higher rate of remission with testosterone compared to placebo<br><br>HDRS score difference: 1.9 points<br><br>Difference in remission rates: 34.1% |
